# Supplementary material for: Eight-year experience of maternal death surveillance in Morocco: qualitative study of stakeholders’ views at a subnational level
Source: Springer Nature journal article supplement (doi:10.1186/s12889-022-14556-0), 2022-11-18

**Additional file 5: Summary of the node tree developed for thematic analysis (NVivo Starter 11).**

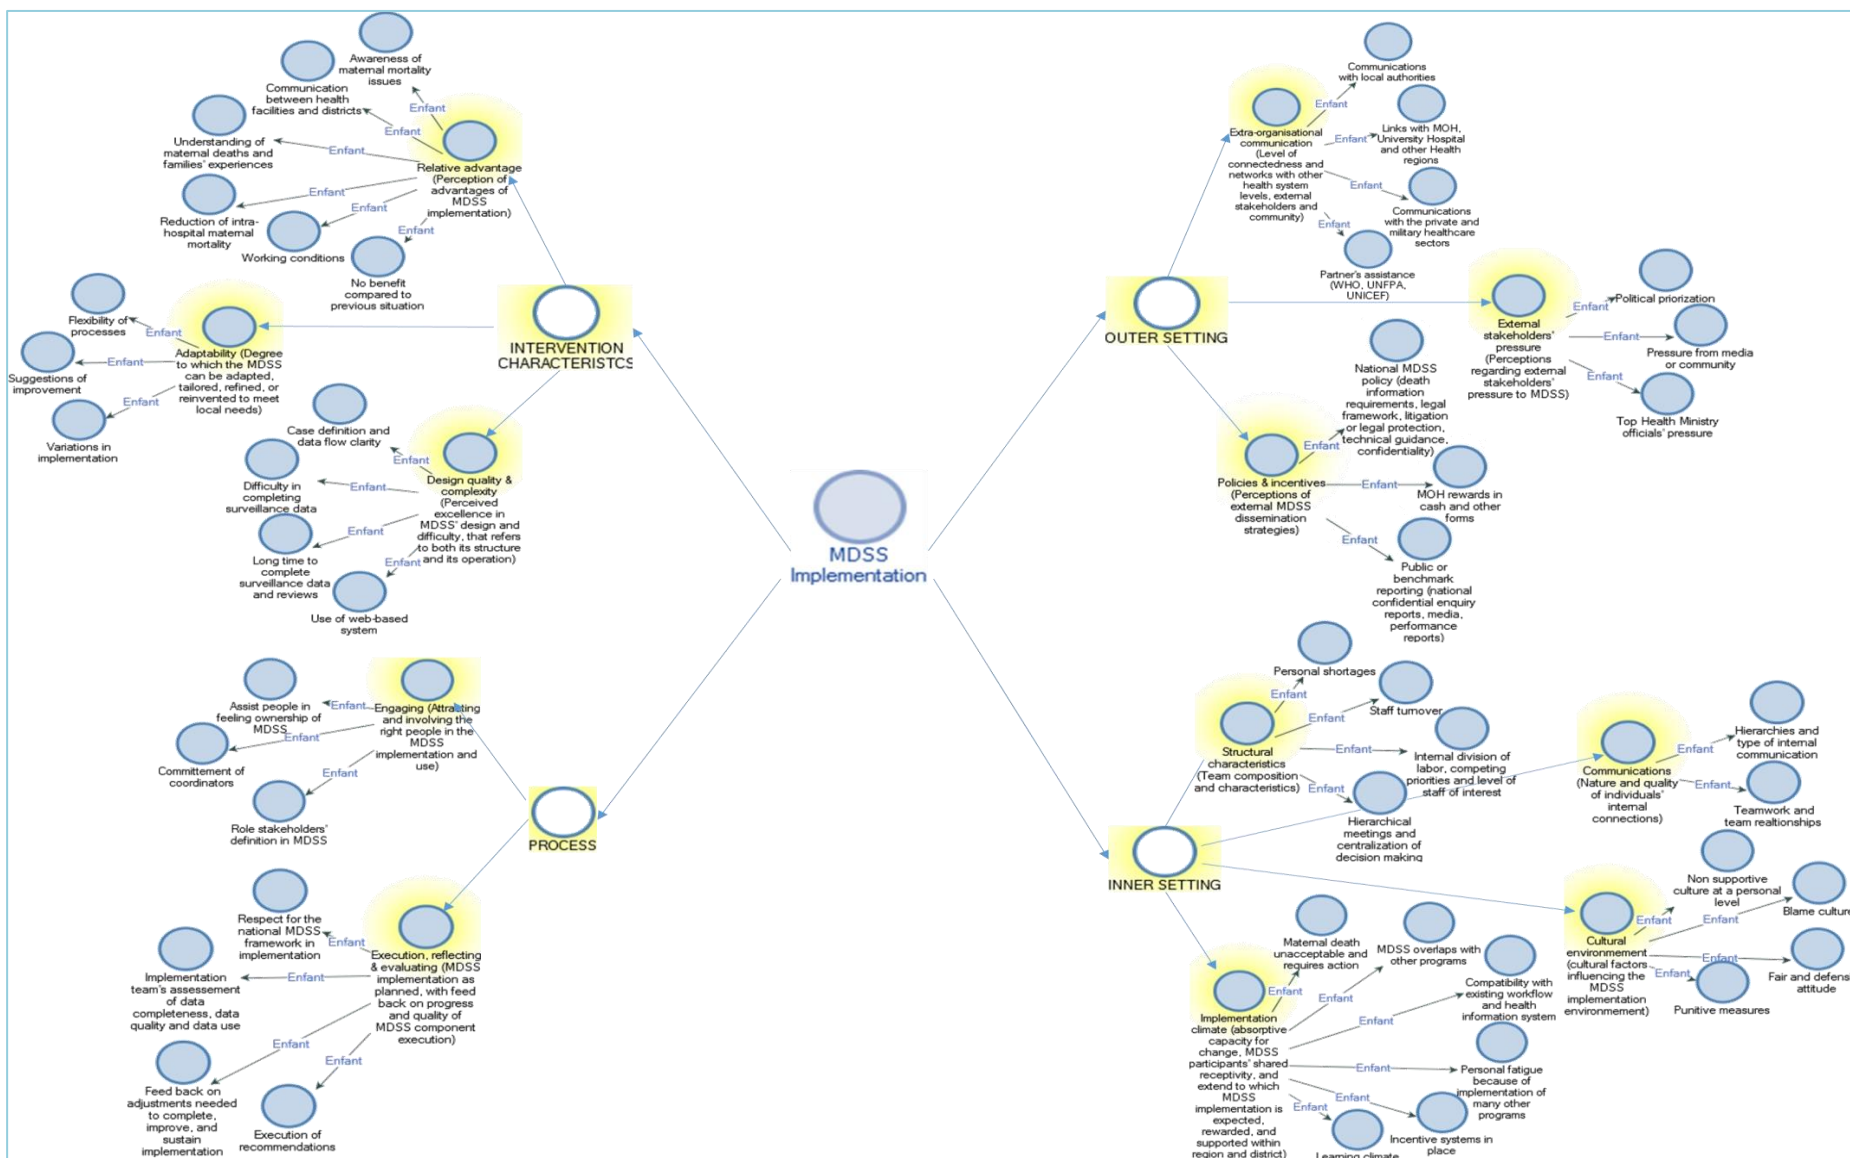

Supplement: MOESM5 [file 23727554]
