# Supplementary material for: Eight-year experience of maternal death surveillance in Morocco: qualitative study of stakeholders’ views at a subnational level
Source: Springer Nature journal article supplement (doi:10.1186/s12889-022-14556-0), 2022-11-18
Supplement: MOESM7 [file 23727554]

## 1 Additional file 7: Grey literature

- 2 • Comité national d'experts sur l'audit confidentiel des décès maternels (CNEAC). Rapport national  
3 de l'enquête confidentielle des décès maternels de 2009. Rabat, Maroc: Ministère de la Santé; 2010.
- 4 • Comité national d'experts sur l'audit confidentiel des décès maternels (CNEAC). Rapport national  
5 de l'enquête confidentielle des décès maternels de 2010. Rabat, Maroc: Ministère de la Santé; 2013.
- 6 • Comité national d'experts sur l'audit confidentiel des décès maternels (CNEAC). Rapport national  
7 de l'enquête confidentielle des décès maternels de 2015 [Internet]. Rabat, Maroc: Ministère de la  
8 Santé; 2017. [https://www.sante.gov.ma/Publications/Documents/rapport%20SSDM%20final%20](https://www.sante.gov.ma/Publications/Documents/rapport%20SSDM%20final%20Edit%20C3%A9%20d%C3%A9c%202015%20.pdf)  
9 [Edit%20C3%A9%20d%C3%A9c%202015%20.pdf](https://www.sante.gov.ma/Publications/Documents/rapport%20SSDM%20final%20Edit%20C3%A9%20d%C3%A9c%202015%20.pdf)
- 10 • Darkaoui K, Abouchadi S, Khassouani C, Kruk ME, El Adawy M, Belghiti Alaoui A, et al. Réduire  
11 la mortalité maternelle au Maroc : Partager l'expérience et soutenir le progrès. Rabat, Maroc:  
12 Ministère de la Santé; 2011. [http://www.abhatoo.net.ma/maalama-textuelle/developpement-](http://www.abhatoo.net.ma/maalama-textuelle/developpement-durable/societe-durable/sante-humaine/maladies-liees-a-l-environnement/maladies-du-systeme-immunitaire/reduire-la-mortalite-maternelle-au-maroc-partager-l-experience-et-soutenir-le-progres)  
13 [durable/societe-durable/sante-humaine/maladies-liees-a-l-environnement/maladies-du-systeme-](http://www.abhatoo.net.ma/maalama-textuelle/developpement-durable/societe-durable/sante-humaine/maladies-liees-a-l-environnement/maladies-du-systeme-immunitaire/reduire-la-mortalite-maternelle-au-maroc-partager-l-experience-et-soutenir-le-progres)  
14 [immunitaire/reduire-la-mortalite-maternelle-au-maroc-partager-l-experience-et-soutenir-le-progres](http://www.abhatoo.net.ma/maalama-textuelle/developpement-durable/societe-durable/sante-humaine/maladies-liees-a-l-environnement/maladies-du-systeme-immunitaire/reduire-la-mortalite-maternelle-au-maroc-partager-l-experience-et-soutenir-le-progres)
- 15 • Direction régionale de la santé de Souss Massa Draa. Rapport régional des enquêtes confidentielles  
16 autour des décès maternels de la région de Souss Massa Draa 2015. Agadir, Maroc: DRS Souss  
17 Massa Draa; 2017.
- 18 • Direction régionale de la santé de Tadla-Azilal. Premier Rapport Régional Sur les Décès Maternels  
19 au titre de l'année 2015. Béni Mellal, Maroc: DRS Tadla Azilal; 2017.
- 20 • Institut National d'Administration Sanitaire (INAS), FNUAP, AMDD, Colombia University. Atelier  
21 National de consensus : Les audits des soins obstétricaux. Rabat, Maroc : INAS et AMDD,  
22 Colombia University; 2001.
- 23 • Ministère de la Santé [Maroc]. Plan d'action 2008 – 2012 pour accélérer la réduction de la mortalité  
24 maternelle et infantile. Rabat : Ministère de la Santé ; 2008. [http://www.abhatoo.net.ma/maalama-](http://www.abhatoo.net.ma/maalama-textuelle/developpement-durable/societe-durable/sante-humaine/nutrition-et-soins-de-sante/traitements-medicaux/plan-d-action-pour-accelerer-la-reduction-de-la-mortalite-maternelle-et-infantile-periode-2008-2012)  
25 [textuelle/developpement-durable/societe-durable/sante-humaine/nutrition-et-soins-de-](http://www.abhatoo.net.ma/maalama-textuelle/developpement-durable/societe-durable/sante-humaine/nutrition-et-soins-de-sante/traitements-medicaux/plan-d-action-pour-accelerer-la-reduction-de-la-mortalite-maternelle-et-infantile-periode-2008-2012)  
26 [sante/traitements-medicaux/plan-d-action-pour-accelerer-la-reduction-de-la-mortalite-maternelle-et-](http://www.abhatoo.net.ma/maalama-textuelle/developpement-durable/societe-durable/sante-humaine/nutrition-et-soins-de-sante/traitements-medicaux/plan-d-action-pour-accelerer-la-reduction-de-la-mortalite-maternelle-et-infantile-periode-2008-2012)  
27 [infantile-periode-2008-2012](http://www.abhatoo.net.ma/maalama-textuelle/developpement-durable/societe-durable/sante-humaine/nutrition-et-soins-de-sante/traitements-medicaux/plan-d-action-pour-accelerer-la-reduction-de-la-mortalite-maternelle-et-infantile-periode-2008-2012)
- 28 • Ministère de la Santé [Maroc], Lettre N° 1268, 8 septembre 2008, Déclaration des décès de femmes  
29 de 15-49 ans.
- 30 • Ministère de l'Intérieur, dgcl/dpe/dhsp [Maroc], Lettre N° D6918, 29 septembre 2008, Déclaration  
31 obligatoire des décès de femmes de 15-49 ans.
- 32 • Ministère de la Santé [Maroc], Circulaire ministérielle n° 103, 3 décembre 2008, Notification des  
33 décès maternels.
- 34 • Ministère de la Santé [Maroc], Décision ministérielle n° 24, 6 janvier 2009, Désignation des  
35 membres du comité national d'experts d'audit confidentiel des décès maternels et néonataux  
36 (CNEAC).
- 37 • Ministère de la Santé [Maroc]. Modalités pratiques de mise en place du système de surveillance des  
38 décès maternels (guide). Rabat : Ministère de la Santé, DHSA ; 2009.
- 39 • Ministère de la Santé [Maroc], Circulaire ministérielle n° 118, 3 juin 2009, Lancement de l'enquête  
40 confidentielle des décès maternels.
- 41 • Ministère de la Santé [Maroc]. Plan d'action 2012 – 2016 pour accélérer la réduction de la mortalité  
42 maternelle et néonatale. Rabat : Ministère de la Santé ; 2012. <http://www.abhatoo.net.ma/maalama->

- 43 [textuelle/developpement-economique-et-social/developpement-social/sante/politique-sanitaire/plan-](#)  
44 [d-action-2012-2016-pour-acceler-la-reduction-de-la-mortalite-maternelle-et-neonatale-fin-du-](#)  
45 [compte-a-rebours-2015](#)
- 46 • Ministère de la Santé & Ministère de l'Intérieur [Maroc], Circulaire conjointe n°69, 20 octobre 2015  
47 (CR 4154/ 6 octobre 2015), Renforcement du système de surveillance des décès maternels.
  - 48 • Ministère de la Santé [Maroc], Circulaire ministérielle n° 150, 27 avril 2016, Domiciliation du  
49 système de surveillance des décès maternels à l'Ecole Nationale de Santé Publique.
  - 50 • Ministère de la Santé [Maroc], Eliminer les décès évitables des mères et des nouveau-nés, Stratégie  
51 2017-2021, Janvier 2017.
  - 52 • Ministère de la Santé [Maroc], Décision ministérielle n° 13867, 25 octobre 2017, Institution de Task  
53 Forces Régionales pour le pilotage des plans d'actions régionaux relatifs à la stratégie nationale  
54 d'élimination des décès évitables des mères, des nouveau nés et des enfants de moins de cinq ans.
  - 55 • Ministère de la Santé [Maroc], Circulaire ministérielle n° 54, 5 novembre 2018, Domiciliation du  
56 système de surveillance des décès maternels, audits des décès néonataux et riposte à la Direction de la  
57 Population.
- 58  
59
